# Supplementary material
Source: ML conference proceedings conference paper supplement (https://proceedings.neurips.cc/paper_files/paper/2007/hash/1385974ed5904a438616ff7bdb3f7439-Abstract.html)
Supplement: Supplementary file [file 1385974ed5904a438616ff7bdb3f7439-Supplemental.zip]

# Ensemble Clustering using Semidefinite Programming W2

Vikas Singh<sup>1</sup>, Lopamudra Mukherjee<sup>2</sup>, Jiming Peng<sup>3</sup>, Jinhui Xu<sup>2</sup>

<sup>1</sup>Biostatistics and Medical Informatics  
University of Wisconsin – Madison  
vsingh@biostat.wisc.edu

<sup>2</sup>Computer Science & Engineering  
State University of New York at Buffalo  
{lm37, jinhui}@cse.buffalo.edu

<sup>3</sup>Industrial and Enterprise Systems Eng.  
University of Illinois Urbana Champaign  
pengj@uiuc.edu

**The Problem:** How to best combine the **ensemble of multiple clustering solutions** in a maximum consent sense?

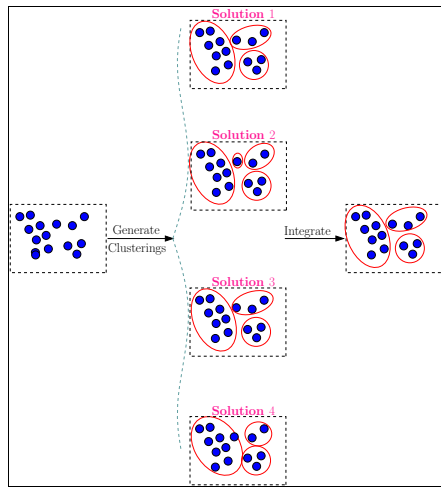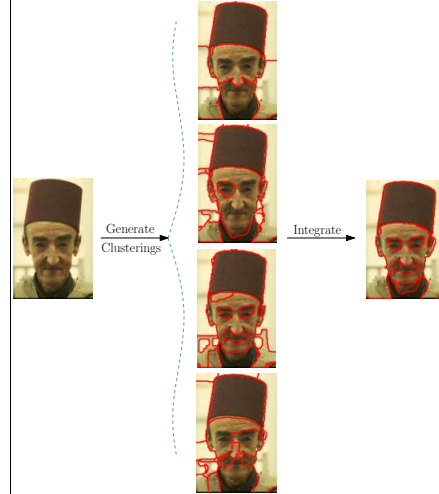

## Goal

- Let  $P_1, P_2, \dots, P_m$  be  $m$  partitions of the data.
- Each partition  $P_i$  is produced by a different algorithm,  $C_i$  in an ensemble.
- Goal is to derive a partition  $P^*$  for the ensemble.

## Motivations

- No single clustering algorithm is perfect.
- In most real life applications, no ground truth is known.
- An ensemble will most likely be superior to individual solutions.

## Existing Graph Partitioning based approaches

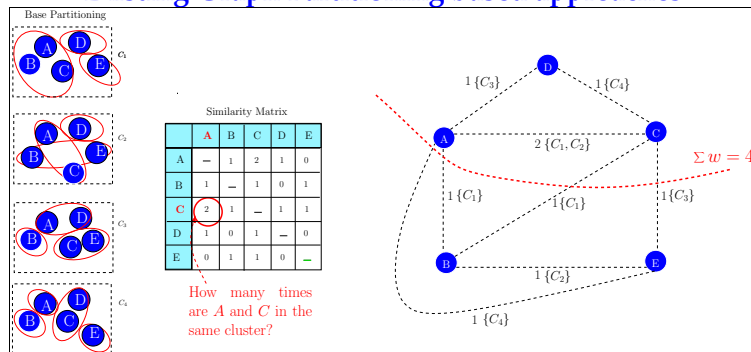

Compute togetherness  
frequency/votes/weight of items, but  
**considered pairwise**

## Do pairwise voting strategies work?

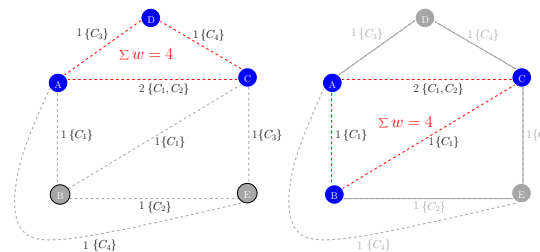

$(A, C, D)$  and  $(A, B, C)$  are same weight-wise, **but**

**Which algorithms put  $(A, C, D)$  together?**

Answer: None

**Which algorithms put  $(A, B, C)$  together?**

Answer: At least one ( $C_1$ )

**Is this information useful?**

Answer: **Yes**, as cohesiveness measures in clusters of size  $\geq 2$

## Our contributions

- A new string encoding based strategy captures **this** cohesiveness/agreement better.
- A new IP model to optimize similarity.
- Model can be convexified to a precise SDP.
- Show applications to novel domains (such as segmentation) in addition to regular classification tasks.
- Empirically, also optimizes Normalized Mutual Information well.

*So, we'll see you at the poster then!*
